# Supplementary material for: Source process of the 14 February 2008 M6.7 Earthquake Offshore South Peloponnese (Greece)
Source: JCI journal article supplement (doi:10.1172/jci31080), 2009-04-01
Supplement: sd1 [file 1]

**Supplement Table 1.** Ca<sup>2+</sup> transients of electrically paced wild-type and CASQ2 deficient cardiomyocytes during constant Caffeine (10mM) perfusion

|                                | <b>WT (n=6)</b> | <b>M (n=9)</b> | <b>P value</b> |
|--------------------------------|-----------------|----------------|----------------|
| <b>Baseline (F2 ratio)</b>     | 0.66±0.13       | 0.659±0.07     | ns             |
| <b>Peak height (F2 ratio)</b>  | 0.25±0.05       | 0.26±0.8       | ns             |
| <b>Time to peak 50% (msec)</b> | 17±6            | 26±12          | ns             |
| <b>Tau (msec)</b>              | 389±57          | 425±73         | ns             |
| <b>Area (mm<sup>2</sup>)</b>   | 99±16           | 107±31         | ns             |

**Supplement Table 2.** Ca<sup>2+</sup> transients and sarcomere lengths of wild-type Cells with and without Mg. Analysis of 14 cells from 3 mice.

|                                   | WT         | WT+ Mg <sup>2+</sup> | P value |
|-----------------------------------|------------|----------------------|---------|
| <b>Baseline (F2 ratio)</b>        | 0.5±0.14   | 0.47±0.10            | ns      |
| <b>Peak height (F2 ratio)</b>     | 0.39±0.009 | <b>0.25±0.03</b>     | 0.001   |
| <b>Time to peak 50% (msec)</b>    | 9±1        | 10±3                 | ns      |
| <b>Tau (msec)</b>                 | 119±19     | 123±21               | ns      |
| <b>Area (mm<sup>2</sup>)</b>      | 55±17      | <b>36±6</b>          | 0.014   |
| <b>Rest Sarcomere length (μm)</b> | 1.71±6     | 1.7±5                | ns      |
| <b>% Sarcomere shortening</b>     | 6.6±2.5    | <b>2.7±1.6</b>       | 0.001   |



# Supplement Figure 1

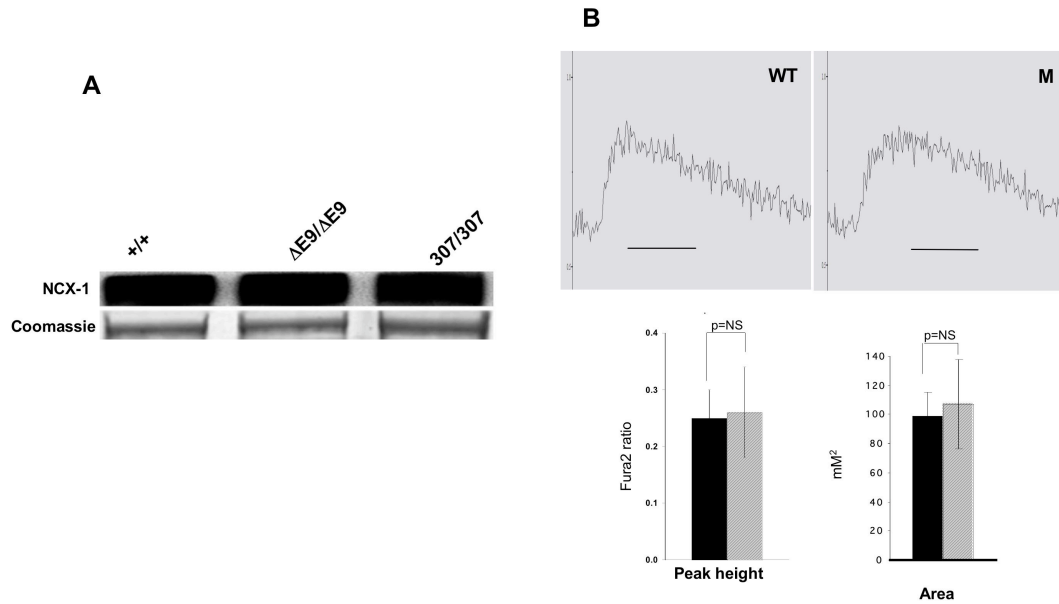

**Figure 1.** Assessment of Na<sup>+</sup>/Ca<sup>2+</sup> exchanger (NCX) levels and activity. **(A)** Western blot analyses of NCX protein in cardiac extracts from mutant and wildtype mice. Note unchanged protein levels in CASQ2-deficient hearts. **(B)** Ca<sup>2+</sup> transients produced by electrical stimulation (60 Hz) of wildtype (WT) and CASQ2-deficient (M = CASQ<sup>ΔE9/ΔE9</sup> and CASQ<sup>307/307</sup>) myocytes in 10mM caffeine Ca<sup>2+</sup> Tyrode solution. Traces represent the average of 15 contraction-relaxation cycles from one representative cell of each genotype. (Bar = 0.2 second). Graphs denote pooled data from 6 WT (black) and 9 mutant cells (striped). \* p=ns.
